# Supplementary material for: Discrimination between ionic silver and silver nanoparticles in consumer products using graphite furnace atomic absorption spectrometry
Source: Royal Society of Chemistry journal article supplement (doi:10.1039/c8ja00310f), 2018-01-01
Supplement: c8ja00310f1.pdf [file c8ja00310f1.pdf]

Electronic Supplementary Material (ESI) for Journal of Analytical Atomic Spectrometry.  
This journal is © The Royal Society of Chemistry 2018

## Discrimination between ionic silver and silver nanoparticles in consumer products using graphite furnace atomic absorption spectrometry

Jakub Gruszka<sup>a</sup>, Elżbieta Zambrzycka-Szelewa<sup>a</sup>, Janusz S. Kulpa<sup>b</sup>, Beata Godlewska-Żyłkiewicz<sup>a\*</sup>

<sup>a</sup> Department of Analytical Chemistry, Institute of Chemistry, University of Białystok, K. Ciołkowskiego 1K, 15-245 Białystok, Poland.

<sup>b</sup> Electrical, Computer, Software, and Systems Engineering Department Embry-Riddle Aeronautical University, Daytona Beach, FL 32114

Corresponding author: E-mail: bgodlew@uwb.edu.pl

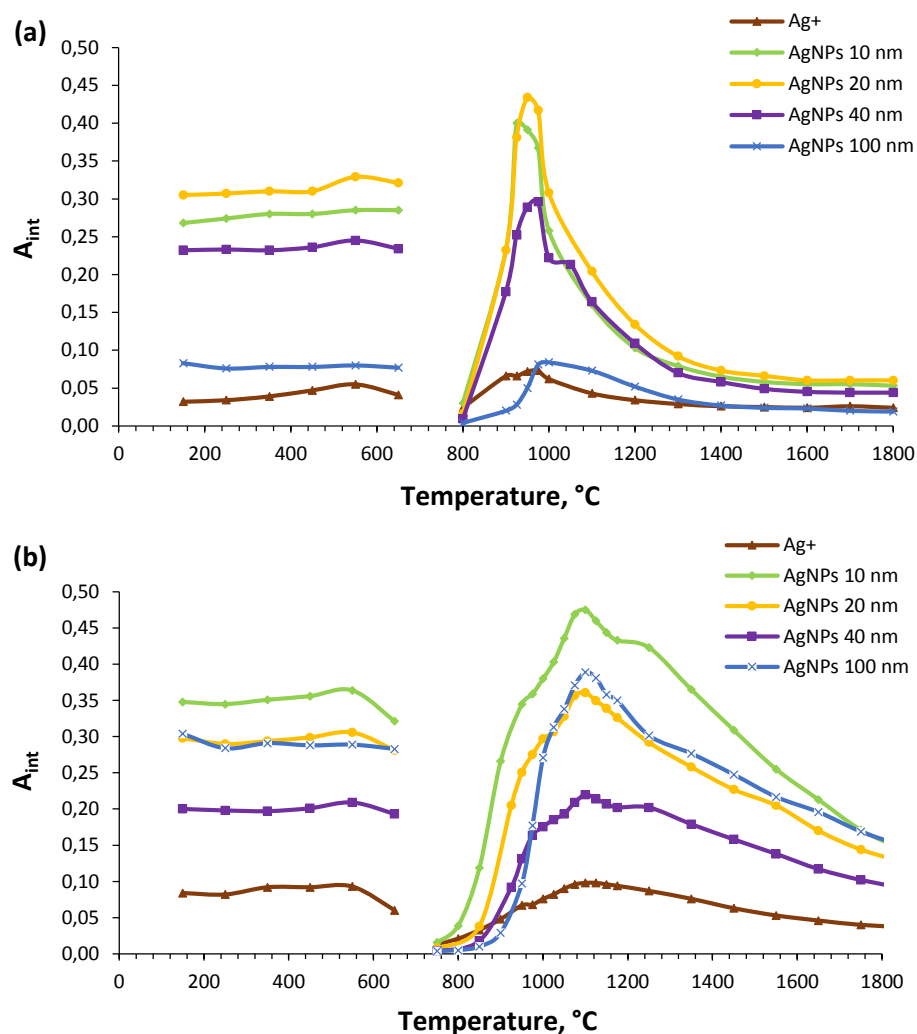

**Fig. ESI 1.** Pyrolysis and atomization curves of the standards containing  $5 \mu\text{g L}^{-1}$  of  $\text{Ag}^+$  or AgNPs stabilized with  $2 \cdot 10^{-3} \text{ mol L}^{-1}$  trisodium citrate: **a)** wall atomization; pyrolysis curves ( $T_{at} = 950^\circ\text{C}$ ), atomization curves ( $T_{pyr} = 250^\circ\text{C}$ ); **b)** atomization from pyro-coated tube with Omega platform; pyrolysis curves ( $T_{at} = 1050^\circ\text{C}$ ), atomization curves ( $T_{pyr} = 350^\circ\text{C}$ ).

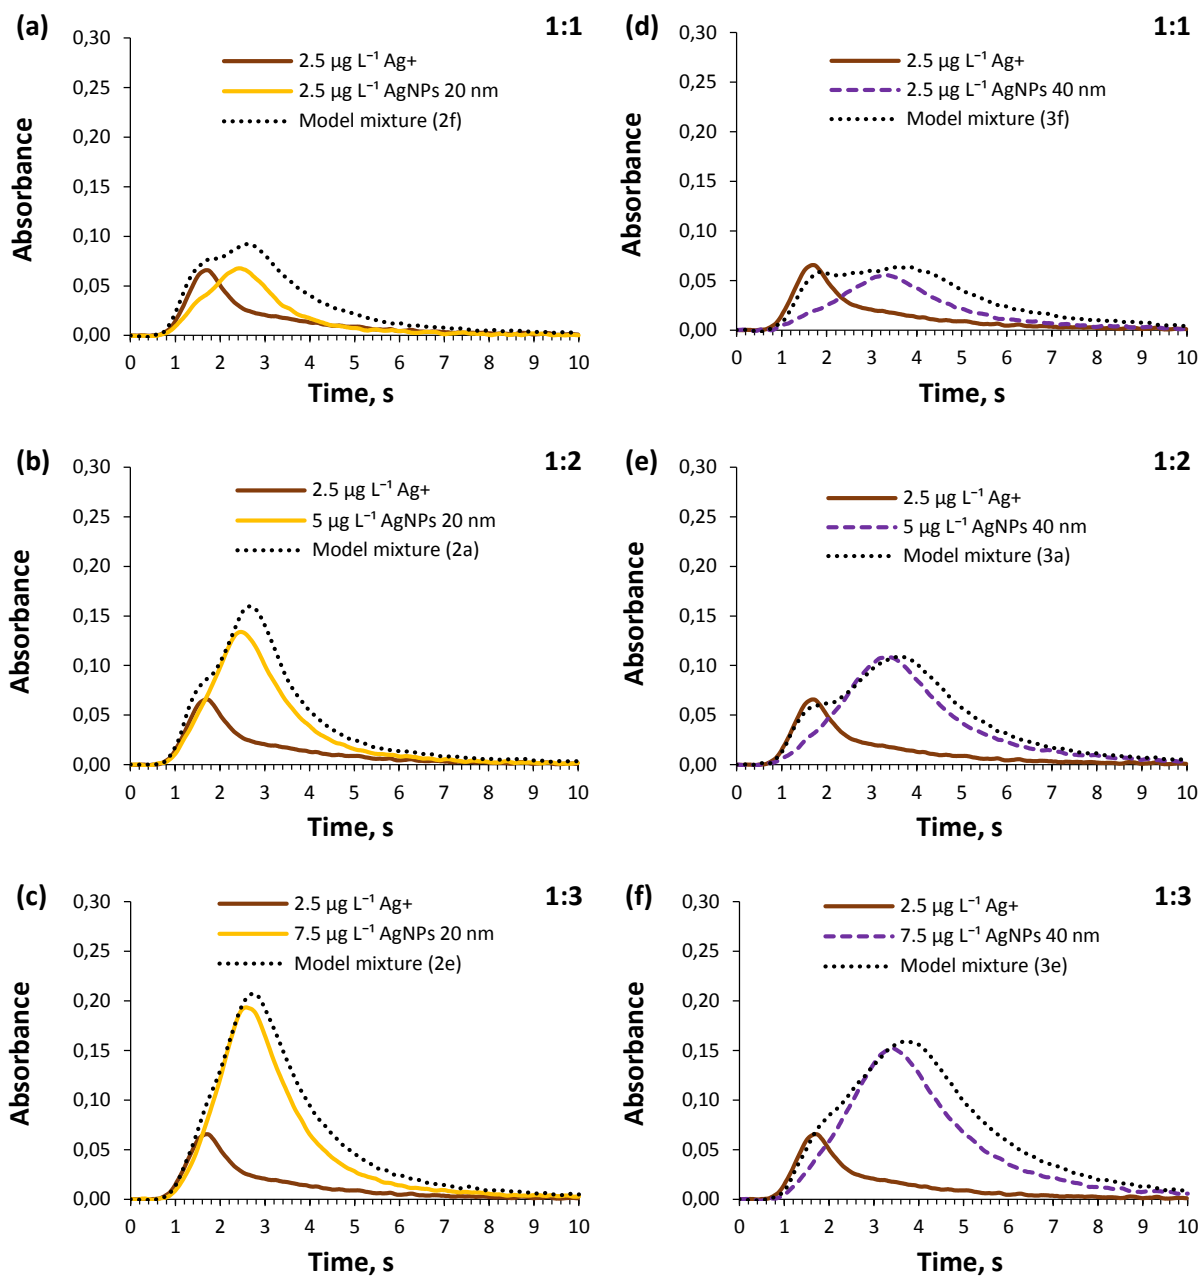

**Fig. ESI 2.** Atomic absorption signals registered for individual silver form and model mixtures containing  $\text{Ag}^+$  and AgNPs of nominal diameter of 20 nm (a-c) or 40 nm (d-f) in different concentrations ratio.

**Table ESI 1**

The composition of model mixtures tested for simultaneous determination of Ag<sup>+</sup> and AgNPs.

| Qualitative composition |                 |             | Quantitative composition |                                                              |     |                                                  |
|-------------------------|-----------------|-------------|--------------------------|--------------------------------------------------------------|-----|--------------------------------------------------|
| Series                  | X               | Y           | N                        | Ag <sup>+</sup> or AgNPs concentration, $\mu\text{g L}^{-1}$ |     | Total silver concentration, $\mu\text{g L}^{-1}$ |
|                         |                 |             |                          | X                                                            | Y   |                                                  |
| <b>1</b>                | Ag <sup>+</sup> | AgNPs 10 nm |                          |                                                              |     |                                                  |
| <b>2</b>                | Ag <sup>+</sup> | AgNPs 20 nm |                          |                                                              |     |                                                  |
| <b>3</b>                | Ag <sup>+</sup> | AgNPs 40 nm |                          |                                                              |     |                                                  |
| <b>4</b>                | Ag <sup>+</sup> | AgNPs 60 nm | <b>a</b>                 | 2.5                                                          | 5.0 | 7.5                                              |
| <b>5</b>                | AgNPs 10 nm     | AgNPs 60 nm | <b>b</b>                 | 5.0                                                          | 2.5 | 7.5                                              |
| <b>6</b>                | AgNPs 10 nm     | AgNPs 40 nm | <b>c</b>                 | 5.0                                                          | 5.0 | 10.0                                             |
| <b>7</b>                | AgNPs 20 nm     | AgNPs 40 nm | <b>d</b>                 | 7.5                                                          | 2.5 | 10.0                                             |
| <b>8</b>                | AgNPs 10 nm     | AgNPs 20 nm | <b>e</b>                 | 2.5                                                          | 7.5 | 10.0                                             |
| <b>9</b>                | AgNPs 20 nm     | AgNPs 60 nm | <b>f</b>                 | 2.5                                                          | 2.5 | 5.0                                              |
| <b>10</b>               | AgNPs 40 nm     | AgNPs 60 nm |                          |                                                              |     |                                                  |
